# Supplementary material for: Phylogenomic analyses and host range prediction of cluster P mycobacteriophages
Source: PubMed Central journal article supplement (PMC9635641; doi:10.1093/g3journal/jkac244), 2022-09-12
Supplement: jkac244_supplemental_tables.pdf [file jkac244_supplemental_tables.pdf]

**Table S1. *Mycobacterium* cluster P bacteriophages included in the comparative analyses.** Bacteriophages for which integration-dependent immunity systems had previously been identified through the computational identification of an *attP* site within the repressor gene are highlighted in blue.

| Phage          | Subcluster | Length (bp) | GC-content | # ORFs | # tRNAs | IDIS* | Accession # | Reference                          |
|----------------|------------|-------------|------------|--------|---------|-------|-------------|------------------------------------|
| Arib1          | P1         | 46,732      | 67.5%      | 78     | 0       | yes   | NC_051736.1 | unpublished                        |
| Atcoo          | P1         | 49,075      | 67.0%      | 78     | 0       | yes   | NC_051729.1 | unpublished                        |
| Bartholomew    | P1         | 46,484      | 67.2%      | 77     | 0       | yes   | NC_051734.1 | Doyle <i>et al.</i> 2018           |
| Bogie          | P1         | 48,639      | 66.9%      | 81     | 0       | yes   | MF133446.1  | Doyle <i>et al.</i> 2018           |
| Brusacoram     | P1         | 47,618      | 67.0%      | 78     | 0       | yes   | NC_028747.1 | Hatfull <i>et al.</i> 2016         |
| Bunnies        | P1         | 48,822      | 67.1%      | 81     | 1       | yes   | MN096356.1  | unpublished                        |
| CactusJack     | P1         | 48,222      | 67.3%      | 79     | 0       | yes   | MN892484.1  | unpublished                        |
| Camster        | P1         | 47,149      | 67.2%      | 80     | 0       | yes   | MW055902.1  | unpublished                        |
| Donovan        | P1         | 47,162      | 67.2%      | 78     | 0       | yes   | KF841477.1  | Pope <i>et al.</i> 2015            |
| FirstPlacePfu  | P1         | 45,680      | 67.3%      | 82     | 0       | yes   | NC_051735.1 | unpublished                        |
| Fishburne      | P1         | 47,109      | 67.3%      | 77     | 0       | yes   | NC_021302.1 | Hatfull <i>et al.</i> 2013         |
| Glaske         | P1         | 48,222      | 67.3%      | 78     | 0       | yes   | MN807250.1  | unpublished                        |
| GreaseLightnin | P1         | 48,424      | 67.1%      | 80     | 0       | yes   | NC_051731.1 | unpublished                        |
| HUHilltop      | P1         | 46,896      | 67.2%      | 81     | 0       | yes   | MN010757.1  | Pope <i>et al.</i> 2015            |
| Jebeks         | P1         | 45,580      | 67.3%      | 77     | 0       | yes   | NC_041969.1 | Pope <i>et al.</i> 2015            |
| Jung           | P1         | 46,561      | 67.1%      | 77     | 0       | yes   | NC_051730.1 | Van <i>et al.</i> 2020             |
| KilKor         | P1         | 48,916      | 67.2%      | 79     | 0       | yes   | NC_053209.1 | unpublished                        |
| Ksquared       | P1         | 48,699      | 67.1%      | 80     | 0       | yes   | NC_051732.1 | Doyle <i>et al.</i> 2018           |
| Majeke         | P1         | 47,612      | 67.4%      | 81     | 0       | yes   | NC_051737.1 | unpublished                        |
| Malithi        | P1         | 46,870      | 67.1%      | 79     | 0       | yes   | KP027200.1  | Pope <i>et al.</i> 2015            |
| Mangethe       | P1         | 47,612      | 67.4%      | 81     | 1       | yes   | MK016499.1  | unpublished                        |
| Megiddo        | P1         | 48,783      | 67.1%      | 78     | 0       | yes   | NC_051728.1 | unpublished                        |
| Necropolis     | P1         | 46,263      | 62.9%      | 76     | 0       | yes   | MK937604.1  | unpublished                        |
| Phalm          | P1         | 48,213      | 67.3%      | 79     | 0       | yes   | MN807248.1  | unpublished                        |
| Phegasus       | P1         | 47,578      | 67.4%      | 81     | 0       | yes   | ON637760    | Howell, Versoza <i>et al.</i> 2022 |
| Phineas        | P1         | 47,229      | 67.2%      | 77     | 0       | yes   | NC_051733.1 | Pope <i>et al.</i> 2015            |
| Shipwreck      | P1         | 48,670      | 66.9%      | 81     | 0       | yes   | NC_031261.1 | Pope <i>et al.</i> 2015            |
| StevieRay      | P1         | 48,815      | 66.9%      | 81     | 1       | yes   | MF373843.1  | unpublished                        |
| StressBall     | P1         | 47,915      | 67.3%      | 78     | 0       | yes   | MN908683.1  | unpublished                        |
| Techage        | P1         | 47,094      | 67.4%      | 79     | 0       | yes   | MK919480.1  | unpublished                        |
| Thespis        | P1         | 47,618      | 67.0%      | 78     | 0       | yes   | MG198785.1  | Bushhouse <i>et al.</i> 2017       |
| Willsammy      | P1         | 48,399      | 67.0%      | 80     | 0       | yes   | NC_051727.1 | unpublished                        |
| Zilizebeth     | P1         | 48,056      | 67.3%      | 83     | 1       | yes   | MK524508.1  | unpublished                        |
| Tortellini     | P2         | 49,658      | 65.8%      | 76     | 0       | no    | NC_041888.1 | Doyle <i>et al.</i> 2018           |
| Xavia          | P3         | 49,808      | 65.9%      | 71     | 0       | no    | NC_051740.1 | unpublished                        |
| BigNuz         | P4         | 48,984      | 66.7%      | 82     | 0       | yes   | NC_023692.1 | Pope <i>et al.</i> 2015            |
| Nazo           | P4         | 48,870      | 66.8%      | 83     | 0       | yes   | KX641262    | unpublished                        |
| Phayonce       | P5         | 49,203      | 66.7%      | 77     | 0       | yes   | KR080195    | Pope <i>et al.</i> 2015            |
| ThulaThula     | P5         | 50,415      | 66.5%      | 80     | 0       | no    | MN234172    | Wada <i>et al.</i> 2017            |
| Purky          | P6         | 50,513      | 66.4%      | 84     | 0       | yes   | MN096355.1  | Pope <i>et al.</i> 2015            |

\* integration-dependent immunity system, comprised of an immunity repressor flanked by an integrase, an excise gene, and an anti-repressor

**Table S2. Bacteriophages included in the comparative analyses for which integration-dependent immunity systems had previously been identified** (green: experimentally validated; blue: computationally predicted).

| Phage Name     | Subcluster | Length (bp) | GC-content | # ORFs | # tRNAs | Accession # | Reference                  |
|----------------|------------|-------------|------------|--------|---------|-------------|----------------------------|
| BPs            | G1         | 41,901      | 66.6%      | 63     | 0       | EU568876    | Sampson <i>et al.</i> 2009 |
| Cedarsite      | G1         | 41,901      | 66.6%      | 63     | 0       | KT355472    | Hatfull <i>et al.</i> 2016 |
| Halo           | G1         | 42,289      | 66.7%      | 64     | 0       | NC_008202.2 | Sampson <i>et al.</i> 2009 |
| Island3        | I1         | 47,287      | 66.8%      | 76     | 0       | HM152765.1  | Pope <i>et al.</i> 2011    |
| Babsiella      | I1         | 48,420      | 67.1%      | 78     | 0       | NC_023697.1 | Hatfull <i>et al.</i> 2012 |
| Brujita        | I1         | 47,057      | 66.8%      | 74     | 0       | NC_011291.1 | Hatfull <i>et al.</i> 2010 |
| Charcharodon   | N          | 43,680      | 66.2%      | 71     | 0       | KM588359    | Hatfull <i>et al.</i> 2016 |
| Charlie        | N          | 43,036      | 66.3%      | 69     | 0       | NC_023729.1 | Hatfull <i>et al.</i> 2012 |
| MichelleMyBell | N          | 42,240      | 66.0%      | 70     | 0       | KF986246    | Hatfull <i>et al.</i> 2016 |
| Panchino       | N          | 43,516      | 65.9%      | 66     | 0       | KU935727    | Hatfull <i>et al.</i> 2016 |
| Phrann         | N          | 44,872      | 66.3%      | 67     | 0       | KU935731    | Hatfull <i>et al.</i> 2016 |
| Pipsqueaks     | N          | 43,679      | 66.3%      | 73     | 0       | KU935730    | Hatfull <i>et al.</i> 2016 |
| Redi           | N          | 42,594      | 66.1%      | 70     | 0       | NC_023730.1 | Hatfull <i>et al.</i> 2012 |
| SkinnyPete     | N          | 43,478      | 66.4%      | 67     | 0       | KU935729    | Hatfull <i>et al.</i> 2016 |
| Xeno           | N          | 42,395      | 66.8%      | 69     | 0       | KU935728    | Hatfull <i>et al.</i> 2016 |
| Xerxes         | N          | 43,698      | 66.3%      | 72     | 0       | KU935726    | Hatfull <i>et al.</i> 2016 |

**Table S3. *Mycobacteria* included in the comparative analyses.**

| <b><i>Mycobacterium</i></b> | <b># Genes</b> | <b>Length (kb)</b> | <b>GC-content</b> | <b>Accession #</b> | <b>Reference</b>              |
|-----------------------------|----------------|--------------------|-------------------|--------------------|-------------------------------|
| <i>M. abscessus</i>         | 4,957          | 4,618              | 64.2%             | CP004374           | Kim <i>et al.</i> 2013        |
| <i>M. africanum</i>         | 4,069          | 4,493              | 65.1%             | CP014617           | Hurtado <i>et al.</i> 2016    |
| <i>M. avium</i>             | 3,935          | 3,981              | 69.3%             | AE016958           | Li <i>et al.</i> 2005         |
| <i>M. bovis</i>             | 3,952          | 3,972              | 65.6%             | AM408590           | Brosch <i>et al.</i> 2007     |
| <i>M. canetti</i>           | 4,139          | 4,482              | 65.6%             | HE572590           | Bentley <i>et al.</i> 2012    |
| <i>M. chelonae</i>          | 4,943          | 5,061              | 64.0%             | CP050145           | Gu <i>et al.</i> 2020         |
| <i>M. fortuitum</i>         | 6,023          | 6,255              | 66.2%             | CP011269           | Costa <i>et al.</i> 2015      |
| <i>M. gilvum</i>            | 5,139          | 5,077              | 67.9%             | CP002385           | Kallimanis <i>et al.</i> 2011 |
| <i>M. intracellulare</i>    | 5,143          | 4,936              | 68.1%             | CP003322           | Kim <i>et al.</i> 2012        |
| <i>M. leprae</i>            | 1,604          | 1,620              | 57.8%             | AL450380           | Cole <i>et al.</i> 2001       |
| <i>M. marinum</i>           | 5,422          | 5,973              | 65.2%             | CP000854           | Stinear <i>et al.</i> 2008    |
| <i>M. smegmatis</i>         | 6,692          | 6,508              | 67.4%             | CP001663           | Deshayes <i>et al.</i> 2007   |
| <i>M. tuberculosis</i>      | 3,935          | 3,981              | 65.6%             | AL123456           | Cole <i>et al.</i> 1998       |
| <i>M. ulcerans</i>          | 4,159          | 4,074              | 65.4%             | CP000325           | Stinear <i>et al.</i> 2007    |

**Table S4. Mycobacteriophage integration systems and putative integration sites of *Mycobacterium* cluster P bacteriophages in *M. chelonae* Myco3a (*attB* location: tRNA<sup>Thr</sup> ; 447,412–447,737 bp), *M. leprae* TN (*attB* location: tRNA<sup>Thr</sup> ; 271,936–271,975 bp), and *M. smegmatis* mc<sup>2</sup> (*attB* location: tRNA<sup>Thr</sup> ; 6,222,599–6,222,637 bp).**

| Phage          | BLASTn percent identity |                  |                     |
|----------------|-------------------------|------------------|---------------------|
|                | <i>M. chelonae</i>      | <i>M. leprae</i> | <i>M. smegmatis</i> |
| Arib1          | 38/40 (95%)             | 40/40 (100%)     | 39/39 (100%)        |
| Atcoo          | 38/40 (95%)             | 40/40 (100%)     | 41/42 (98%)         |
| Bartholomew    | 38/40 (95%)             | 40/40 (100%)     | 39/39 (100%)        |
| Bogie          | 38/40 (95%)             | 40/40 (100%)     | 39/39 (100%)        |
| Brusacoram     | 38/40 (95%)             | 40/40 (100%)     | 41/42 (98%)         |
| Bunnies        | 38/40 (95%)             | 40/40 (100%)     | 41/42 (98%)         |
| CactusJack     | 38/40 (95%)             | 40/40 (100%)     | 41/42 (98%)         |
| Camster        | 38/40 (95%)             | 40/40 (100%)     | 41/42 (98%)         |
| Donovan        | 38/40 (95%)             | 40/40 (100%)     | 39/39 (100%)        |
| FirstPlacePfu  | 38/40 (95%)             | 40/40 (100%)     | 39/39 (100%)        |
| Fishburne      | 38/40 (95%)             | 40/40 (100%)     | 39/39 (100%)        |
| Glasko         | 38/40 (95%)             | 40/40 (100%)     | 41/42 (98%)         |
| GreaseLightnin | 38/40 (95%)             | 40/40 (100%)     | 41/42 (98%)         |
| HUHilltop      | 38/40 (95%)             | 40/40 (100%)     | 39/39 (100%)        |
| Jebeks         | 38/40 (95%)             | 40/40 (100%)     | 39/39 (100%)        |
| Jung           | 38/40 (95%)             | 40/40 (100%)     | 41/42 (98%)         |
| KilKor         | 38/40 (95%)             | 40/40 (100%)     | 41/42 (98%)         |
| Ksquared       | 38/40 (95%)             | 40/40 (100%)     | 41/42 (98%)         |
| Majeke         | 38/40 (95%)             | 40/40 (100%)     | 39/39 (100%)        |
| Malithi        | 38/40 (95%)             | 40/40 (100%)     | 41/42 (98%)         |
| Mangethe       | 38/40 (95%)             | 40/40 (100%)     | 39/39 (100%)        |
| Megiddo        | 38/40 (95%)             | 40/40 (100%)     | 41/42 (98%)         |
| Necropolis     | 38/40 (95%)             | 40/40 (100%)     | 39/39 (100%)        |
| Phalm          | 38/40 (95%)             | 40/40 (100%)     | 41/42 (98%)         |
| Phegasus       | 38/40 (95%)             | 40/40 (100%)     | 39/39 (100%)        |
| Phineas        | 38/40 (95%)             | 40/40 (100%)     | 39/39 (100%)        |
| Shipwreck      | 38/40 (95%)             | 40/40 (100%)     | 39/39 (100%)        |
| StevieRay      | 38/40 (95%)             | 40/40 (100%)     | 41/42 (98%)         |
| StressBall     | 38/40 (95%)             | 40/40 (100%)     | 41/42 (98%)         |
| Techage        | 38/40 (95%)             | 40/40 (100%)     | 39/39 (100%)        |
| Thespis        | 38/40 (95%)             | 40/40 (100%)     | 41/42 (98%)         |
| Willsammy      | 38/40 (95%)             | 40/40 (100%)     | 41/42 (98%)         |
| Zilizebeth     | 38/40 (95%)             | 40/40 (100%)     | 39/39 (100%)        |
| BigNuz         | 38/40 (95%)             | 40/40 (100%)     | 39/39 (100%)        |
| Nazo           | 38/40 (95%)             | 40/40 (100%)     | 39/39 (100%)        |
| Phayonce       | 42/45 (93%)             | 44/45 (98%)      | 43/44 (98%)         |
| Purky          | 39/41 (95%)             | 41/41 (100%)     | 42/43 (98%)         |

## REFERENCES

- Bentley SD, Comas I, Bryant JM, Walker D, Smith NH, et al. 2012. The genome of *Mycobacterium africanum* West African 2 reveals a lineage-specific locus and genome erosion common to the *M. tuberculosis* complex. *PLoS Negl. Trop. Dis.* 6(2): e1552.
- Brosch R, Gordon SV, Garnier T, Eiglmeier K, Frigui W, et al. 2007. Genome plasticity of BCG and impact on vaccine efficacy. *Proc. Natl. Acad. Sci. U. S. A.* 104(13): 5596–5601.
- Bushhouse DZ, Bowen EK, Wolyniak MJ. 2017. Isolation and genome annotation of mycobacteriophage Thespis. *H-SC Journal of Sciences.* 6.
- Cole ST, Eiglmeier K, Parkhill J, James KD, Thomson NR, et al. 2001. Massive gene decay in the leprosy bacillus. *Nature.* 409(6823): 1007–1011.
- Cole ST, Brosch R, Parkhill J, Garnier T, Churcher C, et al. 1998. Deciphering the biology of *Mycobacterium tuberculosis* from the complete genome sequence. *Nature.* 393(6685): 537–544.
- Costa KC, Bergkessel M, Saunders S, Korlach J, Newman DK. 2015. Enzymatic degradation of phenazines can generate energy and protect sensitive organisms from toxicity. *mBio.* 6(6): e01520-15.
- Deshayes C, Perrodou E, Gallien S, Euphrasie D, Schaeffer C, et al. 2007. Interrupted coding sequences in *Mycobacterium smegmatis*: authentic mutations or sequencing errors? *Genome Biol.* 8(2): R20.
- Doyle EL, Fillman CL, Reyna NS, Tobiason DM, Westholm DE, et al. 2018. Genome sequences of four cluster P mycobacteriophages. *Genome Announc.* 6(2): e01101-17.
- Gu CH, Zhao C, Hofstaedter C, Tebas P, Glaser L, et al. 2020. Investigating hospital *Mycobacterium chelonae* infection using whole genome sequencing and hybrid assembly. *PLoS One.* 15(11): e0236533.
- Hatfull GF, Jacobs-Sera D, Lawrence JG, Pope WH, Russell DA, et al. 2010. Comparative genomic analysis of 60 mycobacteriophage genomes: genome clustering, gene acquisition, and gene size. *J. Mol. Biol.* 397(1): 119–143.
- Hatfull GF, Science Education Alliance Phage Hunters Advancing Genomics and Evolutionary Science (SEA-PHAGES) Program, KwaZulu-Natal Research Institute for Tuberculosis and HIV (K-RITH) Mycobacterial Genetics Course, University of California – Los Angeles Research Immersion Laboratory in Virology, Phage Hunters Integrating Research and Education (PHIRE) Program. 2016. Complete genome sequences of 61 mycobacteriophages. *Genome Announc.* 4(4): e00389-16.
- Hatfull GF, Science Education Alliance Phage Hunters Advancing Genomics and Evolutionary Science (SEA-PHAGES) Program, KwaZulu-Natal Research Institute for Tuberculosis and HIV (K-RITH) Mycobacterial Genetics Course, University of California – Los Angeles Research Immersion Laboratory in Virology, Phage Hunters Integrating Research and Education (PHIRE) Program. 2013. Complete genome sequences of 63 mycobacteriophages. *Genome Announc.* 1(6): e00847-13.
- Hatfull GF, Science Education Alliance Phage Hunters Advancing Genomics and Evolutionary Science Program, KwaZulu-Natal Research Institute for Tuberculosis and HIV Mycobacterial Genetics Course Students, Phage Hunters Integrating Research and Education Program. 2012. Complete genome sequences of 138 mycobacteriophages. *J. Virol.* 86(4): 2382-4.
- Howell\* AA, Versoza\* CJ, Cerna G, Johnston T, Kakde S, Karuku K, Kowal M, Monahan J, Murray J, Nguyen T, Sanchez Carreon A, Song E, Streiff A, Su B, Youkhana F, Munig S, Patel Z, So M, Sy M, Weiss S, Zhou Y, Pfeifer SP. 2022. Complete genome sequence of the cluster P mycobacteriophage Phegasus. *Microbiol. Resour. Announc.* e00540-22.
- Hurtado UA, Solano JS, Rodriguez A, Robledo J, Rouzaud F. 2016. Draft genome sequence of a *Mycobacterium africanum* clinical isolate from Antioquia, Colombia. *Genome Announc.* 4(3): e00486-16.
- Kallimanis A, Karabika E, Mavromatis K, Lapidus A, Labutti KM, et al. 2011. Complete genome sequence of *Mycobacterium* sp. strain (Spyr1) and reclassification to *Mycobacterium gilvum* Spyr1. *Stand Genomic Sci.* 5(1): 144–153.
- Kim BJ, Kim BR, Hong SH, Seok SH, Kook YH, et al. 2013. Complete genome sequence of *Mycobacterium massiliense* clinical strain Asan 50594, belonging to the type II genotype. *Genome Announc.* 1(4): e00429-13.
- Kim BJ, Choi BS, Lim JS, Choi IY, Lee JH, et al. 2012. Complete genome sequence of *Mycobacterium intracellulare* strain ATCC 13950(T). *J. Bacteriol.* 194(10): 2750.
- Li L, Bannantine JP, Zhang Q, Amonsin A, May BJ, et al. 2005. The complete genome sequence of *Mycobacterium avium* subspecies paratuberculosis. *Proc. Natl. Acad. Sci. U. S. A.* 102(35): 12344–12349.
- Pope WH, Bowman CA, Russell DA, Jacobs-Sera D, Asai DJ, et al. 2015. Whole genome comparison of a large collection of mycobacteriophages reveals a continuum of phage genetic diversity. *eLife.* 4: e06416.

- Pope WH, Jacobs-Sera D, Russell DA, Peebles CL, Al-Atrache Z, et al. 2011. Expanding the diversity of mycobacteriophages: insights into genome architecture and evolution. *PLoS One*. 6(1): e16329.
- Pope WH, Jacobetz E, Johnson CA, Kihle BL, Sobeski MA, et al. 2015. Genome sequence of mycobacteriophage Phayonce. *Genome Announc*. 3(3): e00598-15.
- Sampson T, Broussard GW, Marinelli LJ, Jacobs-Sera D, Ray M, et al. 2009. Mycobacteriophages BPs, Angel and Halo: comparative genomics reveals a novel class of ultra-small mobile genetic elements. *Microbiology*. 155(Pt 9): 2962.
- Stinear TP, Seemann T, Harrison PF, Jenkin GA, Davies JK, et al. 2008. Insights from the complete genome sequence of *Mycobacterium marinum* on the evolution of *Mycobacterium tuberculosis*. *Genome Res*. 18(5): 729–741.
- Stinear TP, Seemann T, Pidot S, Frigui W, Reyssset G, et al. 2007. Reductive evolution and niche adaptation inferred from the genome of *Mycobacterium ulcerans*, the causative agent of Buruli ulcer. *Genome Res*. 17(2): 192–200.
- Van R, Nie W, Abdela F, Eivazi B, Kickbusch D, et al. 2020. Complete genome sequences of cluster P1 and cluster C1 *Mycobacterium smegmatis* phages Jung and Ronan. *Microbiol. Resour. Announc*. 9(34): e00678-20.
- Wada T, Hijikata M, Maeda S, Hang NTL, Thuong PH, et al. 2017. Complete genome sequence of a *Mycobacterium tuberculosis* strain belonging to the east African-Indian family in the indo-oceanic lineage, isolated in Hanoi, Vietnam. *Genome Announc*. 5(24): e00509-17.
